# Supplementary material for: A Novel pH-Regulated, Unusual 603 bp Overlapping Protein Coding Gene pop Is Encoded Antisense to ompA in Escherichia coli O157:H7 (EHEC)
Source: Front Microbiol. 2020 Mar 20;11:377. doi: 10.3389/fmicb.2020.00377 (PMC7103648; doi:10.3389/fmicb.2020.00377)
Supplement: Supplementary file 5 [file Table_4.xlsx]

## Sheet: raw cq values
raw Cq values
	primer for cysG - amplification of genomic DNA
	t0 pBAD + pop technical replicates			LB pBAD + pop technical replicates			L-malic acid pBAD + pop technical replicates			bicine pBAD + pop technical replicates			t0 pBAD + ∆pop technical replicates			LB pBAD + ∆pop technical replicates			L-malic acid pBAD + ∆pop technical replicates			bicine pBAD + ∆pop technical replicates
DNA I	17.7616	17.7917	17.568	17.897	18.1591	18.0464	18.7715	18.7955	18.7825	18.3101	18.1584	18.5234	17.3837	17.2341	17.4023	17.2561	17.793	17.3846	17.0487	16.7233	16.8229	18.4484	18.6768	18.5661
DNA II	18.0114	17.8822	18.0224	18.4919	18.0024	18.3229	38.4783	16.7357	17.5383	18.4275	18.2389	18.2995	17.9895	17.9183	18.0156	18.7556	18.5529	18.7221	17.4597	17.5848	17.731	17.2934	17.2251	17.4782
DNA III	18.1659	18.1688	18.0663	17.7284	17.6491	17.2864	17.4194	17.2026	17.1975	18.8684	18.3788	18.2758	17.9067	17.7183	17.5903	17.1285	17.1801	17.1743	16.7562	17.438	16.7147	18.3075	18.5193	18.4635
controls:
gDNA	17.9331	18.1721
pBAD	17.6886	17.3101	-> gDNA contamination of plasmid-prep
NTC	39.0309	NaN
	primer for bla - amplification of plasmid DNA
	t0 pBAD + pop technical replicates			LB pBAD + pop technical replicates			L-malic acid pBAD + pop technical replicates			bicine pBAD + pop technical replicates			t0 pBAD + ∆pop technical replicates			LB pBAD + ∆pop technical replicates			L-malic acid pBAD + ∆pop technical replicates			bicine pBAD + ∆pop technical replicates
DNA I	12.2299	12.3192	12.6522	12.0465	12.2417	12.1733	14.0582	13.884	13.878	11.3963	11.4021	11.6538	12.8828	12.6086	12.8441	11.9412	11.5665	12.0437	11.5305	11.2476	11.8939	12.7581	12.522	12.6247
DNA II	12.9139	12.9801	12.8954	13.0252	12.9897	13.1026	12.1278	11.8893	12.1002	12.0143	12.2565	11.8438	12.9978	13.068	13.1122	14.4244	14.2845	14.0491	12.5121	12.8041	12.9423	11.6342	11.5798	11.2575
DNA III	12.6488	12.8361	12.4567	12.3403	12.0795	12.2664	12.0405	12.2212	11.9391	13.2092	12.6421	12.6174	12.5765	12.726	12.9403	12.177	12.2963	12.1859	11.8057	12.0507	11.7014	12.749	12.6106	12.6295
controls:
gDNA	32.8347	32.5628
pBAD	9.14873	9.08933
NTC	32.299	34.1905
mean of technical replicates
	bla - plasmid			cysG - genome
	DNA I	DNA II	DNA III	DNA I	DNA II	DNA III
pop t0	12.4004	12.9298	12.6472	17.7071	17.972	18.1337
pop LB	12.1538	13.0392	12.2287	18.0342	18.2724	17.5547
pop acid	13.9401	12.0391	12.0669	18.7832	24.2508	17.2732
pop bicine	11.4841	12.0382	12.8229	18.3306	18.322	18.5077
∆pop t0	12.7785	13.0593	12.7476	17.34	17.9745	17.7385
∆pop LB	11.8505	14.2527	12.2197	17.4779	18.6769	17.161
∆pop acid	11.5573	12.7529	11.8526	16.865	17.5918	16.9696
∆pop bicine	12.6349	11.4905	12.663	18.5638	17.3323	18.4301
quantification cycle differences
	∆Cq(cysG-bla)
	DNA I	DNA II	DNA III
pop t0	5.30667	5.04218	5.48649
pop LB	5.88032	5.23322	5.32592
pop acid	4.84307	12.2117	5.20624
pop bicine	6.84653	6.28378	5.68478
∆pop t0	4.56153	4.91514	4.99088
∆pop LB	5.62744	4.42419	4.94123
∆pop acid	5.30763	4.839	5.11705
∆pop bicine	5.92887	5.84174	5.7671
ratio of quantification cycle differences
	pop(∆Cq)/∆pop(∆Cq)
	DNA I	DNA II	DNA III	MW	SD
t0	1.16335	1.02585	1.0993	1.09617	0.0688075
LB	1.04494	1.18286	1.07785	1.10188	0.0720353
acid	0.912473		1.01743	0.964952	0.0742154
bicine	1.15478	1.07567	0.985726	1.07206	0.084584
